# Supplementary material
Source: Springer Nature journal article supplement (https://www.springermedizin.de/resource/supplementary/13063_2010_643_MOESM4_ESM.pdf/9618384)
Supplement: MOESM4 [file 9618384]

## Sector Means of Sectors allocated to Treatment Group:

Vitamin A

Beta Carotene

Placebo

All Treatment Groups

Early Pregnancy Mid-Upper Arm Circumference (cm, Range: 21.9-24.4)

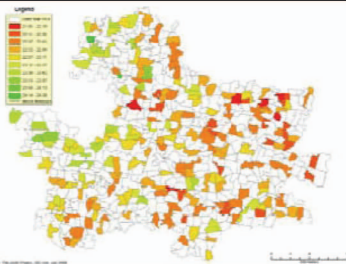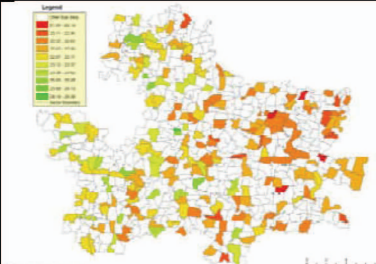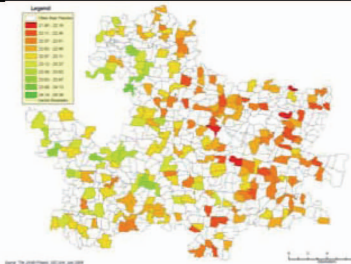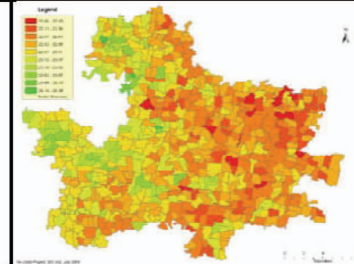

Living Standards Index \*\* (Range: -0.56 to 1.23)

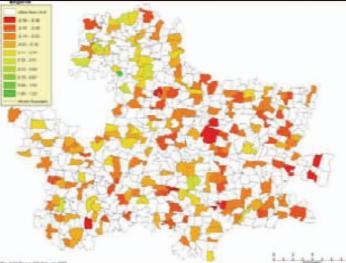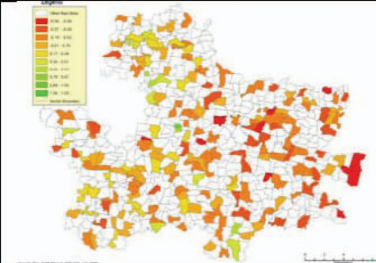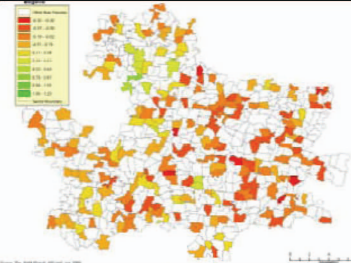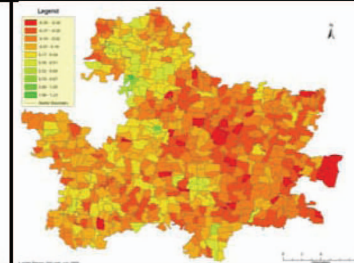

Gestational age at first supplement receipt (Weeks, Range: 8.7 - 13.9)

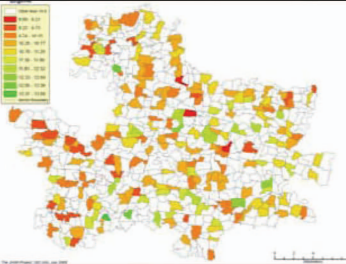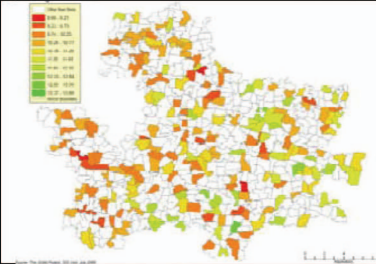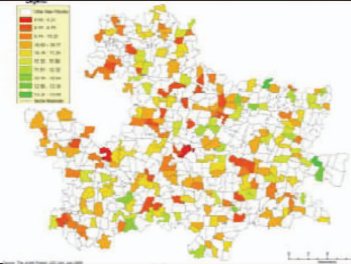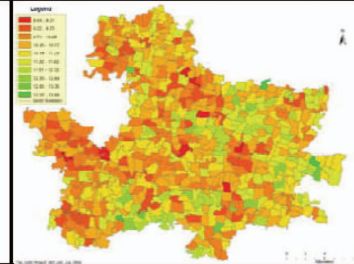

Compliance (Percentage of eligible capsules observed taken, Range: 66.3-90.5%)

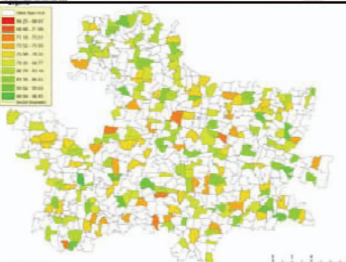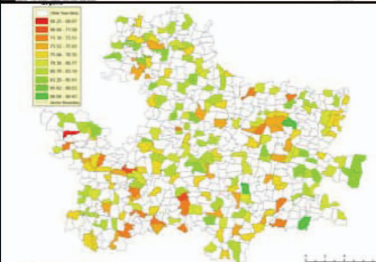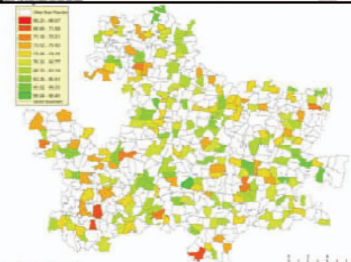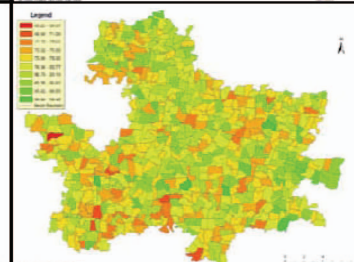

\* All GIS maps use green to represent the highest values, and red to represent the lowest values. Intermediate colors reflect intermediate values between the highest and lowest sector means in the study area. All maps for the same variable were restricted to the same range, to ensure comparability across maps.

\*\* Living Standards Index (LSI) is an index variable designed to estimate socio-economic status, derived from household assets and home construction type, using a principal-components analysis approach.
